# Supplementary material for: Protective effect of fustin against adjuvant-induced arthritis through the restoration of proinflammatory response and oxidative stress
Source: PeerJ. 2023 Jul 26;11:e15532. doi: 10.7717/peerj.15532 (PMC10386820; doi:10.7717/peerj.15532)
Supplement: Supplemental Information 2 [file peerj-11-15532-s002.xlsx]

## Sheet: Biochemical
	n=6
							Proinflammatory cytokines						Antioxidant enzymes and oxidative stress
	Normal	CFA	Fustin-50	Fustin-100			Normal	CFA	Fustin-50	Fustin-100			Normal	CFA	Fustin-50	Fustin-100			Normal	CFA	Fustin-50	Fustin-100
ALT	64.05	97.97	91.75	55.84		TNF-α	32.6	134.4	115.2	61.1		SOD	20.42	6.77	8.32	12.55		MPO	74.8	141.8	96.1	117.2
	55.73	98.28	65.04	74.04			49.5	150	100.6	85.3			15.44	9.4	12.8	13.55			44.3	158.8	133.6	92.6
	55.19	112.88	77.85	81.35			37.8	119.5	84.5	76.2			19.54	7.77	12.24	13.8			52.5	138.2	104.7	84.6
	51.55	128.54	98.16	67.77			72.5	149.8	122.2	85.3			15.98	8.73	10.39	15.19			74.6	186.8	132.5	121.3
	68.69	86.88	68.32	83.19			44.7	117.5	106.6	84.6			17.25	7.64	8.03	12.23			63.6	193	102.6	81.6
	40.5	120.18	62.69	59.59			69.6	121.4	120	93.8			20.52	5.9	14.04	12.56			73.7	181.5	143.7	114.3
AST	64.02	143.84	97.65	85.77		IL-1β	34	108.2	86.7	57.3		CAT	0.73	0.44	0.58	0.64		Nrf-2	0.67	0.22	0.89	0.64
	74	113	86.5	102.1			26.3	92.1	93.6	35.3			0.86	0.52	0.64	0.76			1.34	0.36	0.78	0.98
	66.69	113.49	131.6	88.85			38	87.3	65.2	64.5			0.79	0.53	0.72	0.54			0.82	0.23	0.62	0.75
	60.09	181.47	142.52	92.11			26.5	123.9	62.1	56.8			0.75	0.41	0.61	0.74			1.4	0.38	0.78	1.1
	73.93	172.41	124.11	95.89			35	88.9	67.5	40.5			0.82	0.58	0.74	0.71			0.74	0.21	0.56	0.74
	87.49	175.67	94.78	90.28			41	121.1	63.3	63			0.84	0.48	0.7	0.74			1.2	0.36	0.75	1.12
ALP	148.52	356.89	291.04	221.46		IL-6	50.5	110.2	67.3	64.5		GSH	52.3	38.5	51.26	48.39
	142.67	286.95	201.43	192.69			62.5	106.9	74.1	54.2			43.9	33.9	41.71	39.4
	139.19	297.31	224.61	182.47			41.3	91.6	85.7	55.7			48.4	25.6	36.65	50.5
	148.57	377.44	264.87	220.71			37.6	100	88.53	73.5			50.7	36.6	34.2	46.8
	135.42	292.49	215.37	196.9			44.8	94.4	82.7	56.4			53.4	28.8	45.8	53.9
	156.82	382.92	295.77	228.57			50.2	86.6	68.17	70.14			45.4	33.7	48.6	40.7
PEG2	29.32	54.65	44.38	35.17								MDA	2.7	20.64	10.25	8.13
	21.72	43.26	34.22	32.85									1.9	8.24	7.16	4.31
	24.87	58.13	38.9	27.77									3.1	11.51	8.62	4.68
	26.03	41.79	33.77	31.67									1.7	18.37	11.47	7.16
	28.97	53.06	46.89	33.39									2.8	10.92	8.52	5.13
	20.64	40.97	32.54	34.63									1.82	17.87	10.67	7.46

## Sheet: Hematology profile 
		Hematology profile
		Normal	CFA	Fustin-50	Fustin-100
	Total leukocyte count	15.4	38.61	30.1	18.4
		12.33	41.38	34.8	25.8
		14.86	46.18	26.8	21.2
		10.3	34.2	31.2	26.3
		15.32	44.48	37.5	23.5
		16.3	39.52	28.5	19.14
	Lymphocyte count	510.6	857.73	624.8	732.6
		687.9	1320.2	848.75	764.5
		696.7	941.52	852.7	725.7
		512.4	1279.6	614.7	667.8
		526.3	1296.3	623.8	624.3
		722.5	882.67	838.23	719.8
	Monocyte count	77.95	112.31	113.4	74.6
		62.85	125.57	104.89	94.97
		56.93	139.04	108.58	73.41
		41.86	109.56	77.68	100.41
		52.92	159.61	99.5	89.8
		59.42	135.22	88.47	70.3
	Neutrophil count	267.3	528.1	391.77	351.05
		313.24	615.4	380.5	380.6
		325.92	606.65	492.88	442.9
		373.21	534.2	434.3	326.63
		284.88	645.04	534.7	451.3
		386.9	578.4	440.5	423.8
	Basophile count	12.37	53.75	41.3	38.45
		12.5	62.32	24.12	23.1
		18.74	50.36	23.31	25.51
		17.22	34.17	37.86	23.79
		11.53	34.59	25.28	33.27
		19.55	54.37	37.45	21.48
	Eosinophil count	96.8	262.8	186.9	126.45
		58.2	187.3	127.33	76.8
		56.9	269.9	131.75	83.4
		94.28	198.8	182.16	124.9
		97.64	267.9	191.66	132.8
		53.9	201.6	129.51	63.66

## Sheet: Paw Volume
		Day 7			Day 14			Day 21
	Normal	0.21			0.23			0.23
	CFA	0.71			0.9			0.98
	Butin-25	0.7			0.61			0.54
	Butin-50	0.64			0.59			0.48

## Sheet: Arthiritic score
		7 days			14 days			21 days
	Normal	0			0			0
	CFA	4.683			5.717			5.547
	Butin-25	1.992			2.583			3.192
	Butin-50	1.332			1.313			1.25
